# Supplementary material for: Recombinant IGF-1 Induces Sex-Specific Changes in Bone Composition and Remodeling in Adult Mice with Pappa2 Deficiency
Source: PubMed Central journal article supplement (PMC8070906; doi:10.3390/ijms22084048), 2021-04-14
Supplement: ijms-22-04048-s001.pdf [file ijms-22-04048-s001.pdf]

# SUPPLEMENTARY MATERIAL

## Figure S1

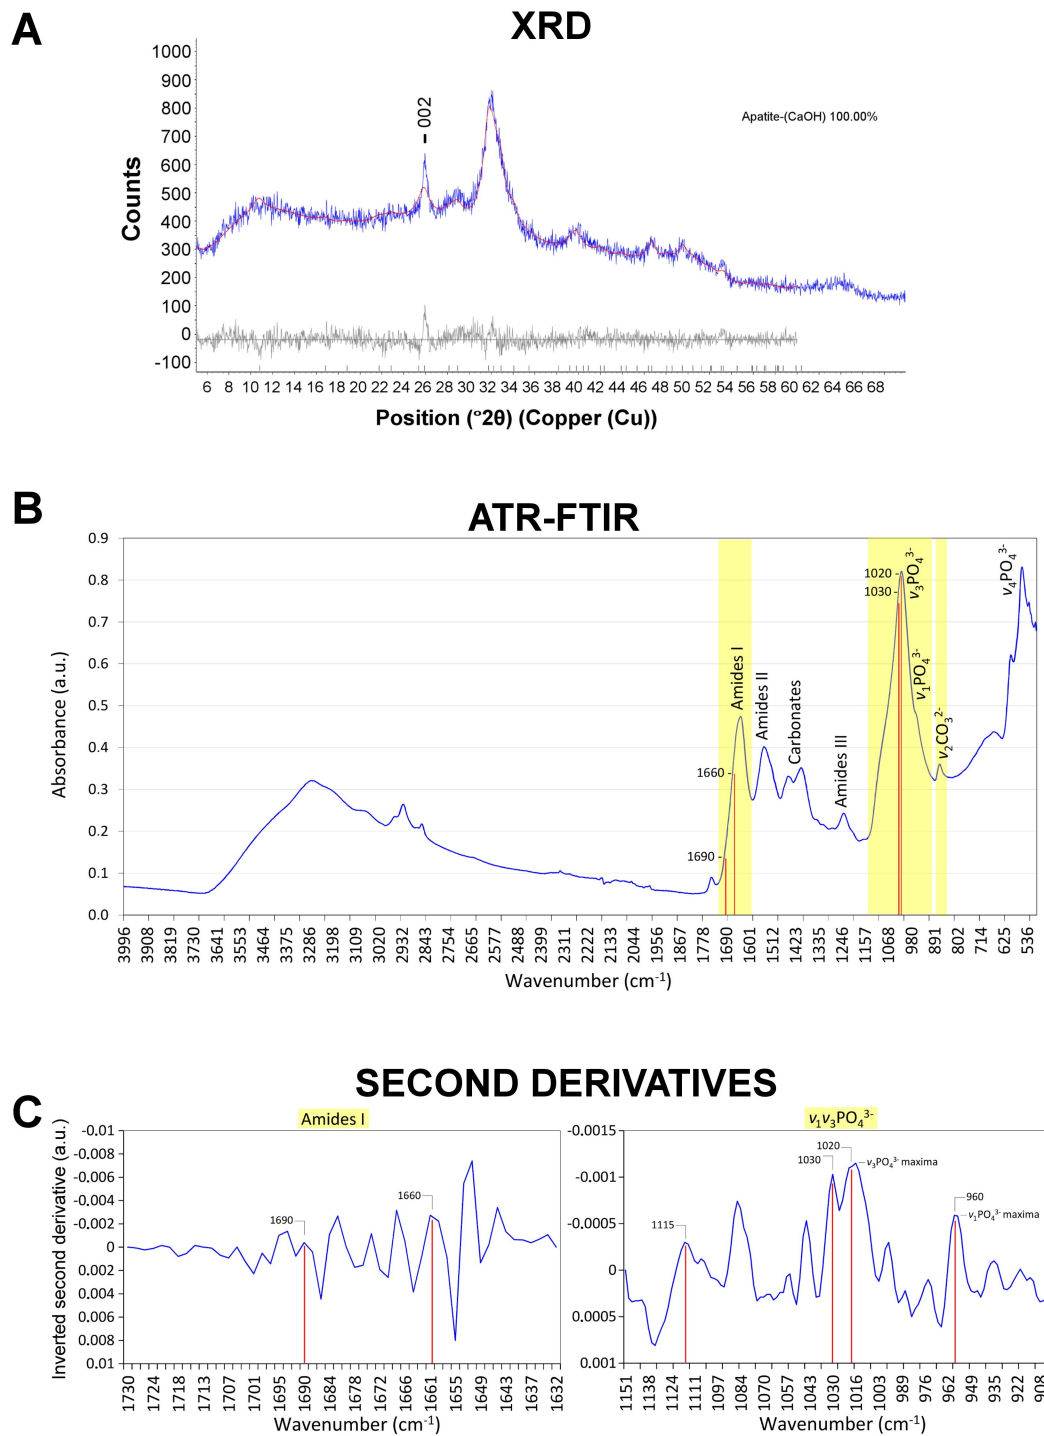

**Table S1.** Quantitative analysis of crystallographic properties of bone hydroxyapatite-(CaOH) in the femur of *Pappa2<sup>wt/wt</sup>* and *Pappa2<sup>ko/ko</sup>* mice (males and females) by XRD and Rietveld refinement (COD no. 9010050; Ca5 H2 O13 P3)<sup>1</sup>.

|                                                      | Male          |               | Female        |               |
|------------------------------------------------------|---------------|---------------|---------------|---------------|
|                                                      | wt/wt         | ko/ko         | wt/wt         | ko/ko         |
| <b>R-Bragg factor (<math>R_B</math>)<sup>2</sup></b> | 0.985 ± 0.080 | 0.999 ± 0.018 | 0.912 ± 0.041 | 1.252 ± 0.313 |
| <b>Cell Volume (Å<sup>3</sup>)</b>                   | 529.67 ± 0.95 | 529.45 ± 1.42 | 529.97 ± 0.36 | 530.53 ± 0.94 |
| <b>Crystal Linear Abs. Coeff. (1/cm)<sup>3</sup></b> | 273.93 ± 0.34 | 273.10 ± 0.31 | 273.44 ± 0.18 | 273.16 ± 0.48 |
| <b>Crystal Density (g/cm<sup>3</sup>)</b>            | 3.153 ± 0.003 | 3.143 ± 0.003 | 3.147 ± 0.002 | 3.144 ± 0.005 |

<sup>1</sup> Data are represented as mean ± S.E.M. ( $n = 7$ /group). No interaction and main effects were found. See **Table 1** and **Figure S1A** for representative diffractograms.

<sup>2</sup> **R-Bragg factor ( $R_B$ ):** The  $R$  factor measuring the agreement between the reflection intensities calculated from a crystallographic model and those measured experimentally.

<sup>3</sup> **Crystal Linear Absorption Coefficient (1/cm):** a measure of the photon beam attenuation by a material due to absorption and scattering processes.

**Table S2.** Quantitative analysis of spectral levels (actual absorbance) of specific ionic contents in the femur of *Pappa2<sup>wt/wt</sup>* and *Pappa2<sup>ko/ko</sup>* mice (males and females)<sup>1</sup>.

|                                                             | Male          |               | Female        |               |
|-------------------------------------------------------------|---------------|---------------|---------------|---------------|
|                                                             | wt/wt         | ko/ko         | wt/wt         | ko/ko         |
| <b>Absorbance (a.u.)</b>                                    |               |               |               |               |
| <b>Phosphates (<math>\nu_1\nu_3\text{PO}_4^{3-}</math>)</b> | 0.445 ± 0.017 | 0.632 ± 0.049 | 0.614 ± 0.048 | 0.621 ± 0.029 |
| <b>Carbonates (<math>\nu_2\text{CO}_3^{2-}</math>)</b>      | 0.245 ± 0.005 | 0.281 ± 0.010 | 0.271 ± 0.007 | 0.263 ± 0.008 |
| <b>Amides I (<math>\nu\text{C=O}</math>)</b>                | 0.425 ± 0.011 | 0.441 ± 0.007 | 0.422 ± 0.003 | 0.413 ± 0.009 |

<sup>1</sup> Data are represented as mean ± S.E.M. ( $n = 7$ /group). See **Figure S1B** for representative spectra.
